# Supplementary material for: Gene Flow and Genetic Structure Reveal Reduced Diversity between Generations of a Tropical Tree, Manilkara multifida Penn., in Atlantic Forest Fragments
Source: MDPI journal article supplement (doi:10.3390/genes12122025), 2021-12-20
Supplement: s1 [file s1]

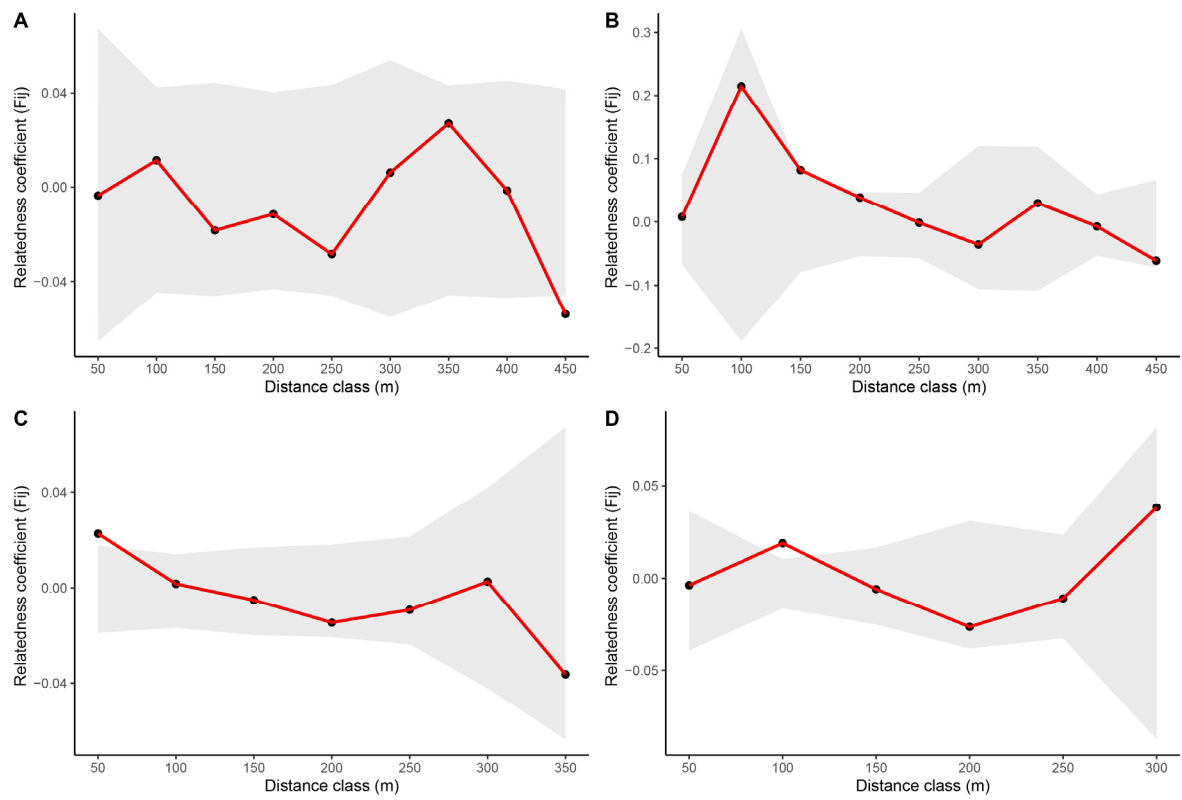

**Figure S1.** Fine-scale spatial genetic structure of *M. multifida* adult and juvenile populations in two protected forests in Brazil.
